# Supplementary figures and images for: Deciphering Master Gene Regulators and Associated Networks of Human Mesenchymal Stromal Cells
Source: MDPI journal article supplement (doi:10.3390/biom10040557), 2020-04-05

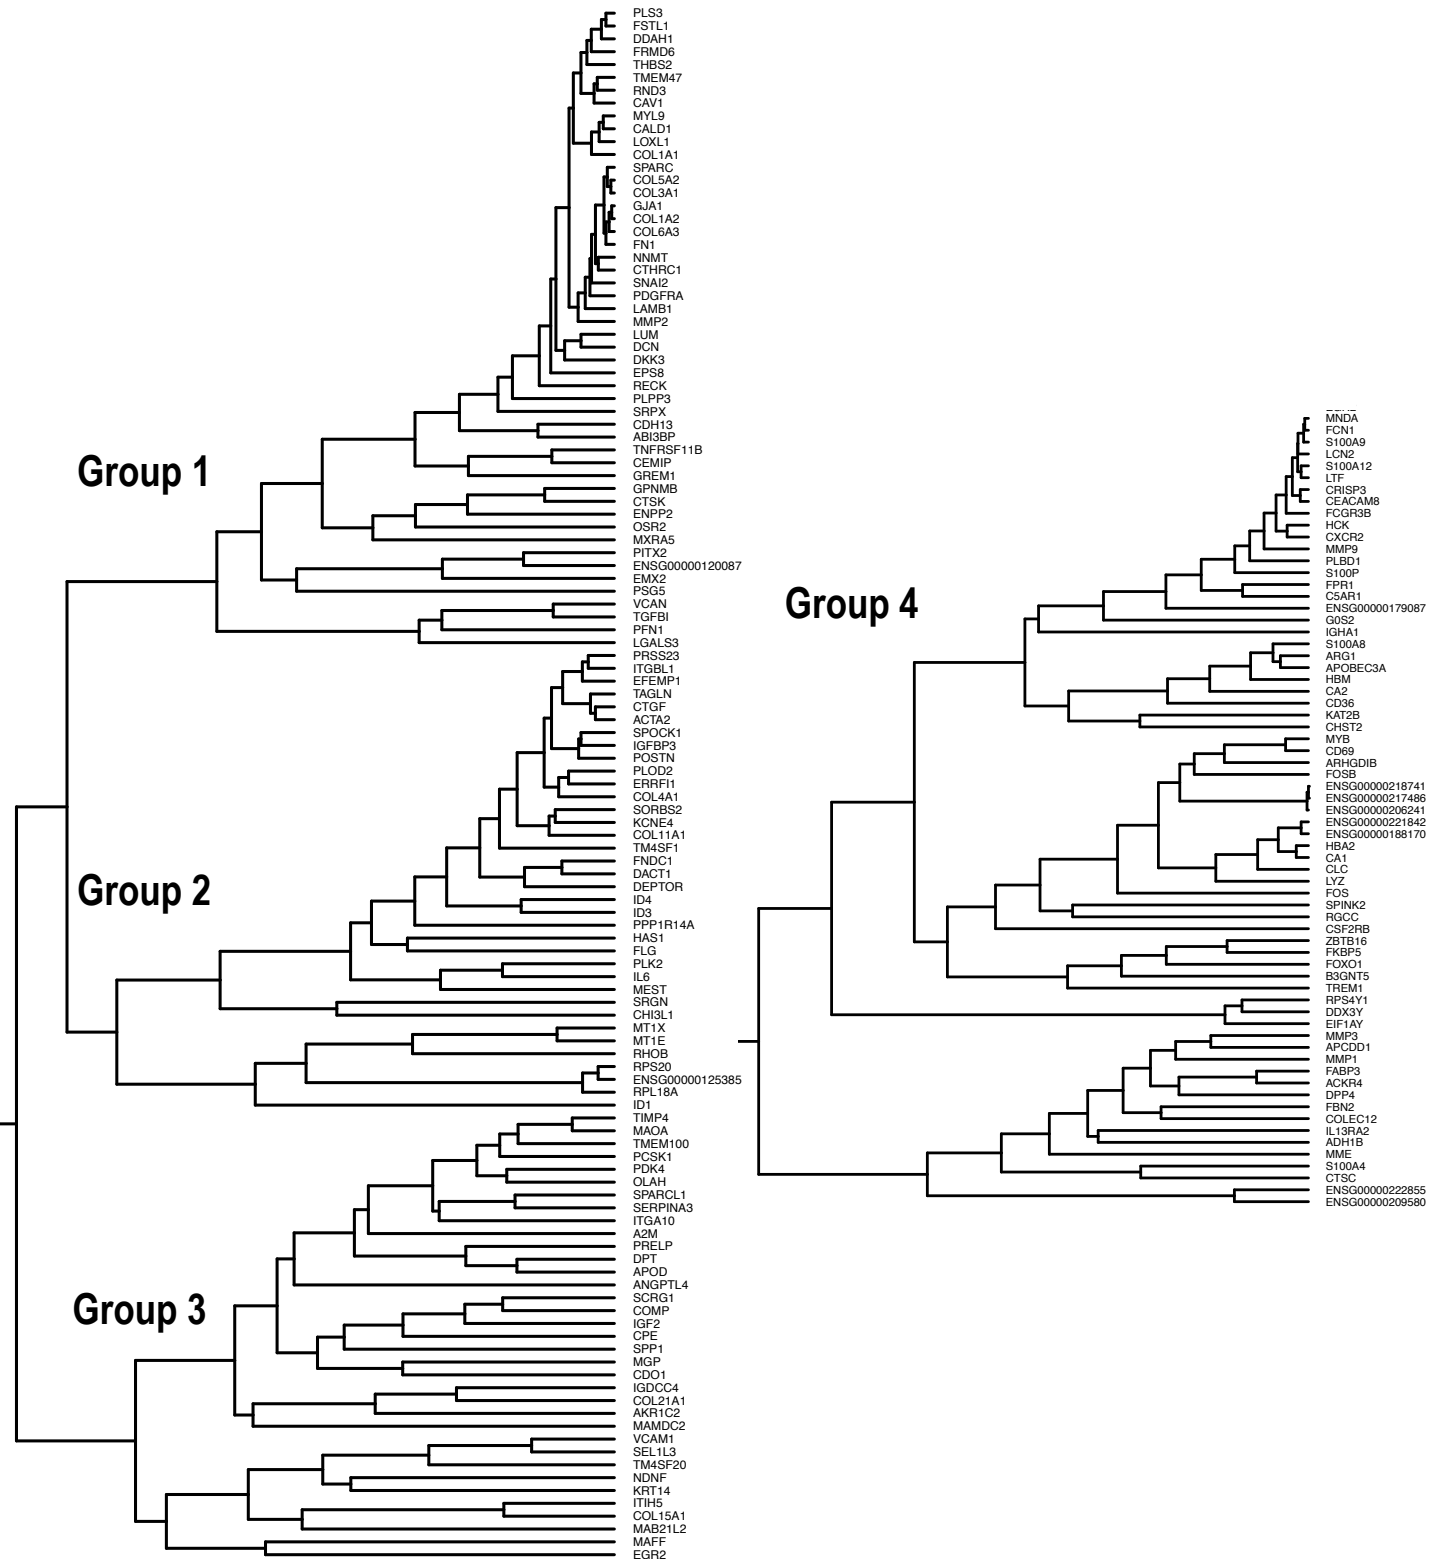

Supplement: s1 [file s1]
